# Supplementary material for: In situ forming gelatin hydrogels by dual-enzymatic cross-linking for enhanced tissue adhesiveness
Source: Royal Society of Chemistry journal article supplement (doi:10.1039/c6tb02179d), 2016-12-08
Supplement: c6tb02179d1.pdf [file c6tb02179d1.pdf]

## Electronic Supplementary Information

### ***In situ* forming gelatin hydrogels by dual-enzymatic cross-linking for enhanced tissue adhesiveness**

Phuong Le Thi,<sup>†</sup> Yunki Lee,<sup>†</sup> Dai Hai Nguyen, and Ki Dong Park\*

Department of Molecular Science and Technology, Ajou University, 5 Woncheon, Yeongtong, Suwon, 443-749, Republic of Korea

<sup>†</sup> *These authors contributed equally to this work.*

## **Materials and Methods**

### *Rheology*

The rheological measurement was performed using a rheometer (Advanced Rheometer GEM-150-050, Malvern Instruments, Malvern, UK) in oscillatory mode, where frequency was varied from 0.1 to 20 Hz at a fixed strain (0.01%). The measurements were conducted at 37°C. The GH hydrogels formed by single- or dual-enzymatic cross-linking were prepared on the bottom plate of rheometer. After 10 min and 30 min gelation, the upper cone was lowered to a measuring gap size of 0.5 mm and the elastic modulus ( $G'$ ) was recorded.

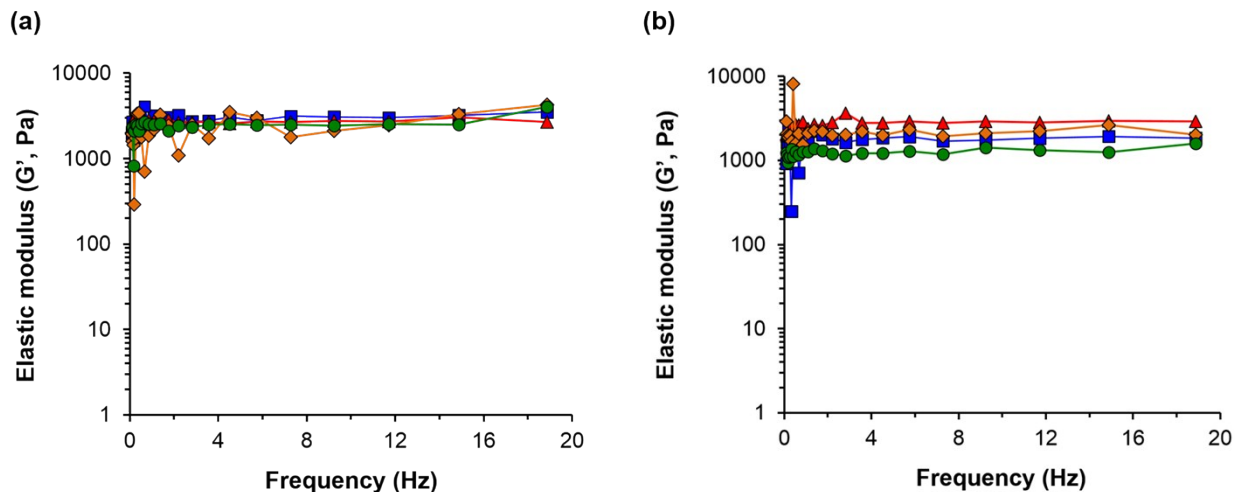

**Fig. S1.** Frequency sweep data showing elastic modulus ( $G'$ ) of GH/HRP (■), GH/HRP/Tyr0.25 (▲), GH/HRP/Tyr0.5 (◆) and GH/HRP/Tyr5 (●) hydrogels at 37°C after 10 min (a) and 30 min (b) gelation.

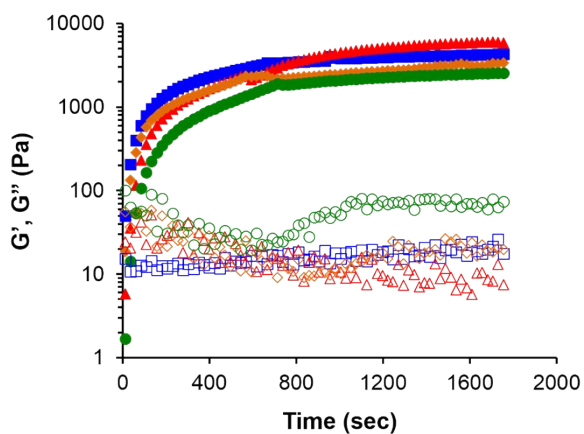

**Fig. S2.** Time sweep of GH hydrogels as a function of Tyr concentration.  $G'$  values (solid fill) and  $G''$  values (no fill) for GH/HRP (■), GH/HRP/Tyr0.25 (▲), GH/HRP/Tyr0.5 (◆) and GH/HRP/Tyr5 (●) hydrogels were measured at frequency of 0.1 Hz.
